# Supplementary material for: Blockade of VLA4 sensitizes leukemic and myeloma tumor cells to CD3 redirection in the bone marrow microenvironment
Source: PubMed Central journal article supplement (PMC7264144; doi:10.1038/s41408-020-0331-4), 2020-06-01
Supplement: 41408_2020_331_MOESM4_ESM.pdf [file 41408_2020_331_MOESM4_ESM.pdf]

**A**

| Sample                                             | KG-1 Cytotoxicity EC <sub>50</sub> (nM) | H929 Cytotoxicity EC <sub>50</sub> (nM) |
|----------------------------------------------------|-----------------------------------------|-----------------------------------------|
|                                                    | <b>CD123xCD3</b>                        | <b>BCMAxCD3</b>                         |
| Bispecific Ab                                      | 0.005                                   | 0.23                                    |
| Bispecific Ab+HS-5                                 | 0.02                                    | 0.70                                    |
| Bispecific Ab+HS-27a                               | 0.03                                    | 0.30                                    |
| Bispecific Ab+MSC                                  | 0.03                                    | 1.23                                    |
| Bispecific Ab+CD105 <sup>+</sup> endothelial cells | 0.008                                   | 0.17                                    |
| N = 3 T cell donors                                |                                         |                                         |

**B**

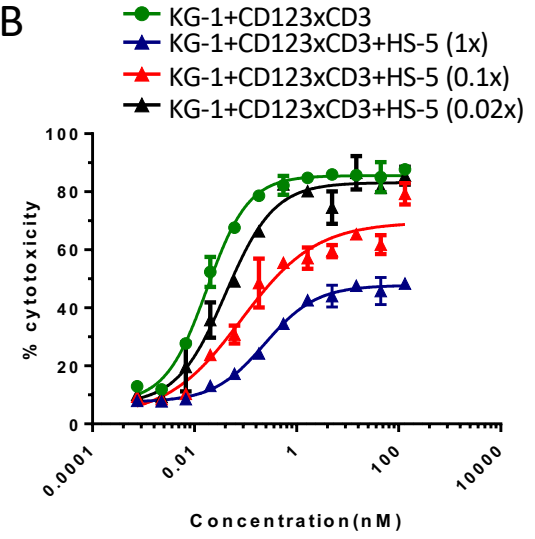

**C**

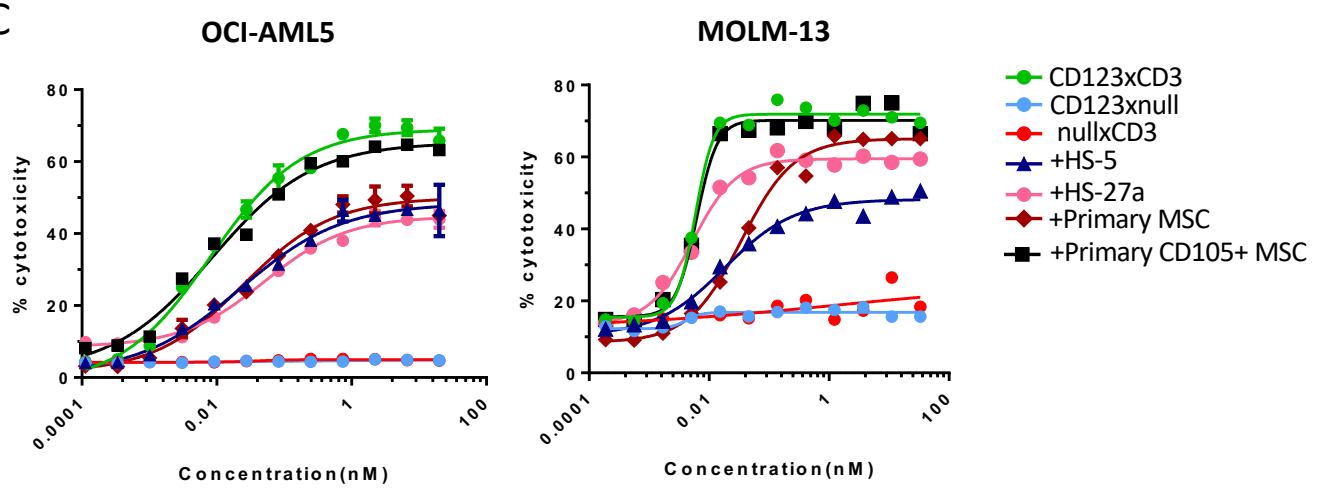

**D**

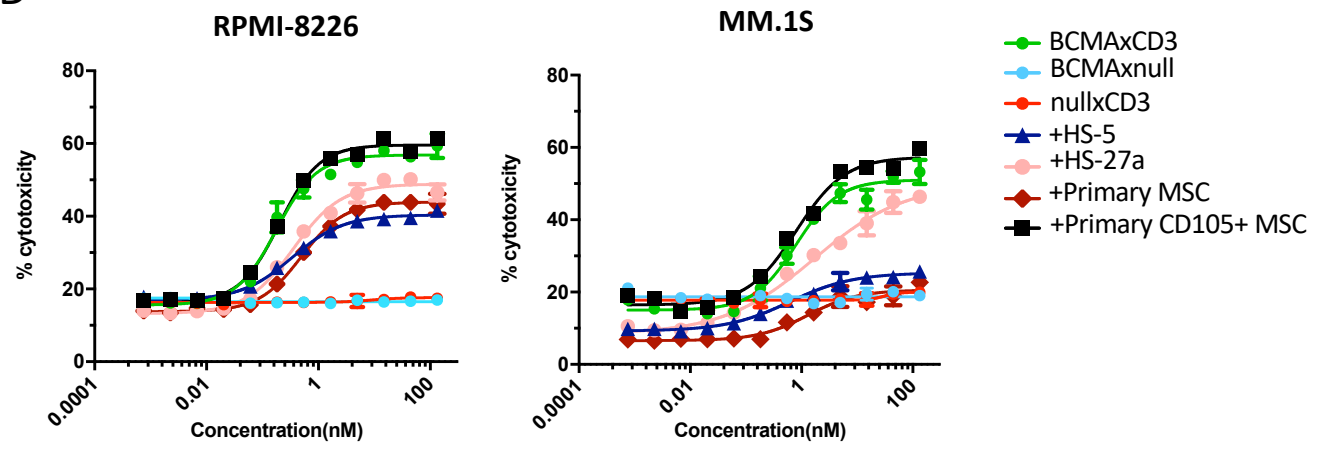

**Supplementary Figure 2**
