# Supplementary material for: Blockade of VLA4 sensitizes leukemic and myeloma tumor cells to CD3 redirection in the bone marrow microenvironment
Source: PubMed Central journal article supplement (PMC7264144; doi:10.1038/s41408-020-0331-4), 2020-06-01
Supplement: 41408_2020_331_MOESM7_ESM.pdf [file 41408_2020_331_MOESM7_ESM.pdf]

A

MOLM-13, CD123xCD3

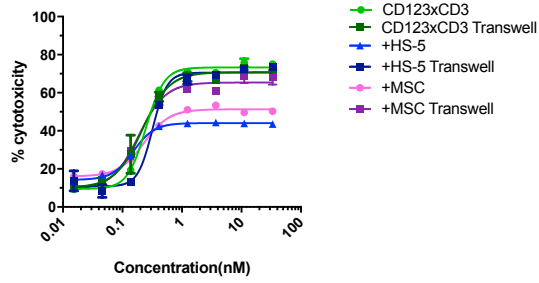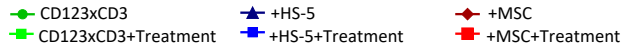

B

MOLM-13, CD123xCD3

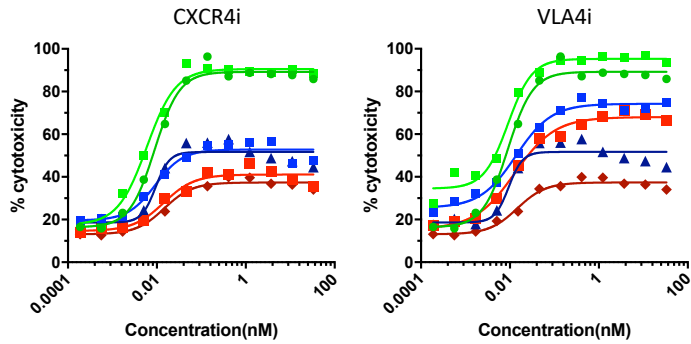

Supplementary Figure 5
